# Supplementary material
Source: PubMed Central journal article supplement (PMC4579406)
Supplement: mmc1.pdf [file mmc1.pdf]

# THE LANCET Psychiatry

## Supplementary appendix

This appendix formed part of the original submission and has been peer reviewed.  
We post it as supplied by the authors.

Supplement to: Fazel S, Wolf A, Chang Z, Larsson H, Goodwin GM, Lichtenstein P.  
Depression and violence: a Swedish population study. *Lancet Psychiatry* 2015; **2**: 244–32.

**Appendix Table 1. First crime after diagnosis.**

| Type of violent crime           | MEN (n=17,249)                 |                        |               | WOMEN (n=29,909)               |                        |                |
|---------------------------------|--------------------------------|------------------------|---------------|--------------------------------|------------------------|----------------|
|                                 | n (% of those with depression) | % of violent offenders | aOR (95% CI)  | n (% of those with depression) | % of violent offenders | aOR (95% CI)   |
| <b>Homicide</b>                 | 5 (0.03%)                      | 0.8%                   | 3.0 (1.1-7.8) | 0 (0%)                         | 0%                     | - (---)        |
| <b>Assault</b>                  | 426 (2.5%)                     | 66.5%                  | 2.9 (2.6-3.2) | 114 (0.4%)                     | 75.0%                  | 2.7 (2.2-3.3)  |
| <b>Sexual offences</b>          | 21 (0.1%)                      | 3.3%                   | 1.8 (1.1-2.7) | 2 (0.01%)                      | 1.3%                   | 5.2 (1.0-25.8) |
| <b>Robbery</b>                  | 31 (0.2%)                      | 4.8%                   | 3.0 (2.0-4.4) | 4 (0.01%)                      | 2.6%                   | 2.8 (1.0-8.3)  |
| <b>Arson</b>                    | 2 (0.01%)                      | 0.3%                   | 2.0 (0.5-8.8) | 1 (0.01%)                      | 0.7%                   | 1.2 (0.2-10.0) |
| <b>Threats &amp; harassment</b> | 231 (1.3%)                     | 36.0%                  | 4.1 (3.5-4.7) | 43 (0.1%)                      | 28.3%                  | 3.3 (2.4-4.5)  |

Note: All aORs (adjusted odds ratios) are compared with general population controls and matched by age and sex. aOR analyses are adjusted for low family income and being born abroad. Homicide includes attempted homicide. Assault includes aggravated assault, common assault, and assaulting an officer. Some cases committed more than one type of crime within a particular incident.

**Appendix Table 2a: Adjusted odds ratios of violent crime in patients with depression and unaffected siblings compared with general population controls, using 2001-2009 follow-up only.**

| <b>2001-2009<br/>follow-up</b> | <b>Paternal half-siblings<br/>n=2,477</b> |               | <b>Maternal half-siblings<br/>n=2,070</b> |               | <b>Full siblings<br/>n=23,372</b> |               |
|--------------------------------|-------------------------------------------|---------------|-------------------------------------------|---------------|-----------------------------------|---------------|
|                                | <b>aOR</b>                                | <b>ROR</b>    | <b>aOR</b>                                | <b>ROR</b>    | <b>aOR</b>                        | <b>ROR</b>    |
| <b>Overall</b>                 | 1.3 (1.0-1.7)                             | 2.3 (1.8-3.0) | 1.4 (1.1-1.8)                             | 2.2 (1.7-2.9) | 1.4 (1.3-1.6)                     | 2.1 (1.8-2.5) |
| <b>Sex</b>                     |                                           |               |                                           |               |                                   |               |
| <b>Male</b>                    | 1.3 (1.0-1.7)                             | 2.4 (1.8-3.2) | 1.4 (1.1-1.9)                             | 2.2 (1.6-2.9) | 1.4 (1.2-1.6)                     | 2.2 (1.9-2.6) |
| <b>Female</b>                  | 1.3 (0.6-2.6)                             | 2.1 (1.1-4.3) | 1.2 (0.6-2.2)                             | 2.4 (1.2-4.6) | 1.6 (1.2-2.3)                     | 1.7 (1.2-2.5) |
| <b>Without previous:</b>       |                                           |               |                                           |               |                                   |               |
| <b>Alc/drug</b>                | 1.3 (1.0-1.8)                             | 2.3 (1.7-3.1) | 1.2 (0.9-1.7)                             | 2.5 (1.8-3.3) | 1.4 (1.2-1.6)                     | 2.2 (1.8-2.5) |
| <b>Violent crime</b>           | 1.3 (0.9-1.8)                             | 2.4 (1.7-3.4) | 1.4 (1.1-1.9.0)                           | 2.2 (1.6-3.1) | 1.4 (1.2-1.7)                     | 2.1 (1.7-2.5) |
| <b>Any crime</b>               | 0.9 (0.5-1.5)                             | 3.0 (1.8-5.0) | 1.3 (0.8-2.0)                             | 2.1 (1.3-3.3) | 1.5 (1.2-1.8)                     | 1.8 (1.4-2.3) |
| <b>Self-harm</b>               | 1.3 (1.0-1.7)                             | 2.4 (1.8-3.1) | 1.4 (1.0-1.8)                             | 2.3 (1.7-3.0) | 1.4 (1.2-1.6)                     | 2.2 (1.9-2.6) |
| <b>All of above</b>            | 1.0 (0.6-1.6)                             | 2.7 (1.6-4.5) | 1.4 (0.9-2.2)                             | 1.9 (1.2-3.0) | 1.4 (1.2-1.7)                     | 1.9 (1.4-2.4) |

All aORs (adjusted odds ratios) are compared with general population controls and matched by age and sex. aOR analyses are adjusted for low family income and being born abroad. ROR=ratio of odds ratios.

**Appendix Table 2b: Adjusted odds ratios of violent crime in patients with depression and unaffected siblings compared with general population controls, using younger siblings only**

| <b>Younger siblings only</b> | <b>Paternal half-siblings<br/>n=975</b> |                | <b>Maternal half-siblings<br/>n=808</b> |                | <b>Full siblings<br/>n=7,691</b> |                |
|------------------------------|-----------------------------------------|----------------|-----------------------------------------|----------------|----------------------------------|----------------|
|                              | <b>aOR</b>                              | <b>ROR</b>     | <b>aOR</b>                              | <b>ROR</b>     | <b>aOR</b>                       | <b>ROR</b>     |
| <b>Overall</b>               | 1.1 (0.5-2.2)                           | 2.8 (1.4-5.9)  | 1.2 (0.6-2.2)                           | 2.6 (1.4-5.1)  | 1.2 (0.9-1.6)                    | 2.5 (1.9-3.5)  |
| <b>Gender</b>                |                                         |                |                                         |                |                                  |                |
| <b>Male</b>                  | 1.3 (0.6-2.7)                           | 2.4 (1.1-5.0)  | 1.2 (0.6-2.4)                           | 2.6 (1.3-5.2)  | 1.4 (1.0-1.8)                    | 2.3 (1.7-3.2)  |
| <b>Female</b>                | - (---)                                 | - (---)        | 0.9 (0.1-6.8)                           | 3.2 (0.4-24.8) | 0.2 (0.0-1.4)                    | 13.8 (1.9-100) |
| <b>Without previous:</b>     |                                         |                |                                         |                |                                  |                |
| <b>Alc/drug</b>              | 1.1 (0.5-2.6)                           | 2.7 (1.2-6.2)  | 0.9 (0.4-2.0)                           | 3.4 (1.5-7.9)  | 1.3 (0.9-1.7)                    | 2.4 (1.7-3.3)  |
| <b>Violent crime</b>         | 1.2 (0.5-3.1)                           | 2.4 (1.0-6.1)  | 1.2 (0.5-2.9)                           | 2.6 (1.0-6.5)  | 1.1 (0.7-1.6)                    | 2.8 (1.8-4.2)  |
| <b>Any crime</b>             | 0.8 (0.2-3.2)                           | 3.5 (0.8-14.6) | 1.1 (0.3-3.6)                           | 2.5 (0.7-8.2)  | 1.0 (0.6-1.7)                    | 2.6 (1.5-4.3)  |
| <b>Self-harm</b>             | 1.1 (0.5-2.3)                           | 2.8 (1.3-6.2)  | 1.0 (0.5-2.1)                           | 3.0 (1.4-6.3)  | 1.2 (0.9-1.6)                    | 2.6 (1.9-3.6)  |
| <b>All of above</b>          | 1.0 (0.2-4.2)                           | 2.6 (0.6-11.2) | 1.1 (0.3-3.8)                           | 2.3 (0.7-7.8)  | 0.9 (0.5-1.6)                    | 2.9 (1.6-5.1)  |

All aORs (adjusted odds ratios) are compared with general population controls and matched by age and sex. aOR analyses are adjusted for low family income and being born abroad. ROR=ratio of odds ratios.

**Appendix Table 2c: Adjusted odds ratios of violent crime in patients with depression and unaffected siblings compared with general population controls, using older siblings only**

| <b>Older siblings only</b> | <b>Paternal half-siblings<br/>n=7,759</b> |               | <b>Maternal half-siblings<br/>n=5,992</b> |               | <b>Full siblings<br/>n=25,825</b> |               |
|----------------------------|-------------------------------------------|---------------|-------------------------------------------|---------------|-----------------------------------|---------------|
|                            | <b>OR</b>                                 | <b>ROR</b>    | <b>OR</b>                                 | <b>ROR</b>    | <b>OR</b>                         | <b>ROR</b>    |
| <b>Overall</b>             | 1.2 (1.1-1.4)                             | 2.5 (2.2-2.8) | 1.2 (1.1-1.4)                             | 2.5 (2.2-2.8) | 1.5 (1.4-1.6)                     | 2.0 (1.8-2.3) |
| <b>Gender</b>              |                                           |               |                                           |               |                                   |               |
| <b>Male</b>                | 1.2 (1.1-1.4)                             | 2.6 (2.2-2.9) | 1.2 (1.1-1.4)                             | 2.5 (2.2-3.0) | 1.4 (1.3-1.6)                     | 2.2 (1.9-2.5) |
| <b>Female</b>              | 1.2 (0.9-1.6)                             | 2.3 (1.7-3.2) | 1.2 (0.9-1.7)                             | 2.2 (1.6-3.2) | 1.9 (1.5-2.4)                     | 1.4 (1.1-1.9) |
| <b>Without previous:</b>   |                                           |               |                                           |               |                                   |               |
| <b>Alc/drug</b>            | 1.2 (1.1-1.4)                             | 2.5 (2.2-2.9) | 1.2 (1.1-1.4)                             | 2.5 (2.2-2.9) | 1.4 (1.3-1.6)                     | 2.1 (1.8-2.4) |
| <b>Violent crime</b>       | 1.2 (1.0-1.3)                             | 2.6 (2.2-3.0) | 1.2 (1.1-1.4)                             | 2.4 (2.0-2.9) | 1.5 (1.3-1.7)                     | 2.0 (1.7-2.3) |
| <b>Any crime</b>           | 1.1 (0.9-1.3)                             | 2.4 (1.9-3.0) | 1.3 (1.1-1.6)                             | 2.0 (1.6-2.5) | 1.5 (1.3-1.7)                     | 1.8 (1.5-2.2) |
| <b>Self-harm</b>           | 1.2 (1.1-1.3)                             | 2.6 (2.2-3.0) | 1.2 (1.1-1.4)                             | 2.5 (2.2-2.9) | 1.5 (1.3-1.6)                     | 2.1 (1.8-2.4) |
| <b>All of above</b>        | 1.1 (0.9-1.3)                             | 2.3 (1.9-2.9) | 1.3 (1.1-1.6)                             | 2.0 (1.6-2.5) | 1.4 (1.2-1.7)                     | 1.8 (1.5-2.2) |

All aORs (adjusted odds ratios) are compared with general population controls and matched by age and sex. aOR analyses are adjusted for low family income and being born abroad. ROR=ratio of odds ratios.

**Appendix Figure 1. Absolute rates of self-harm, violent crime, and suicide in patients with depression, by sex.**

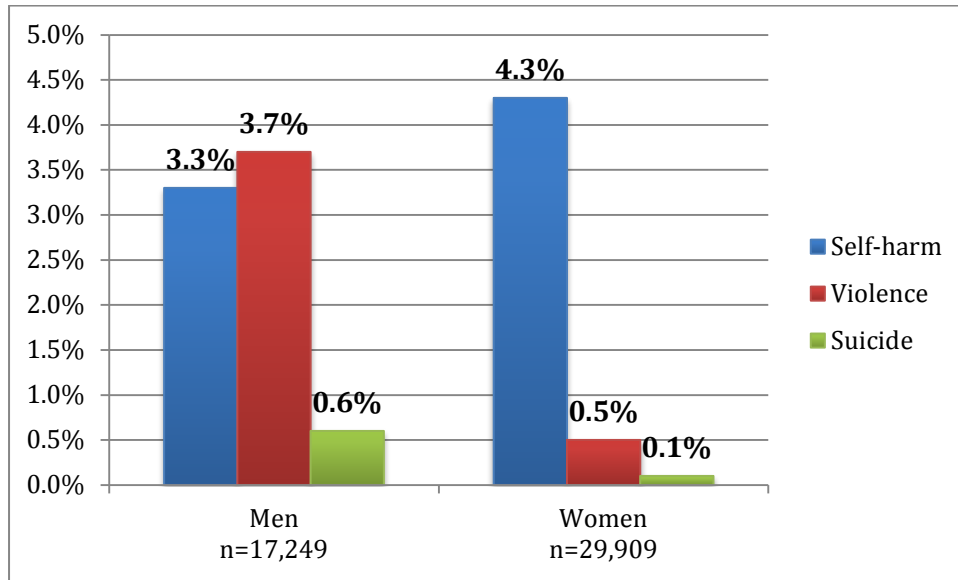

Note: Mean follow-up of 3.0 years (SD 2.3) for men, 3.2 years (2.3) for women.
